# Supplementary material for: Distinct Patterns of SARS-CoV-2 BA.2.87.1 and JN.1 Variants in Immune Evasion, Antigenicity and Cell-Cell Fusion
Source: PubMed Central journal article supplement — bioRxiv. 2024 Mar 11:2024.03.11.583978. Preprint. [Version 1] doi: 10.1101/2024.03.11.583978 (PMC10979924; doi:10.1101/2024.03.11.583978), 2024-03-11
Supplement: NIHPP2024.03.11.583978v1-supplement-1.pdf [file NIHPP2024.03.11.583978v1-supplement-1.pdf]

404

**Table S1. Bivalent-vaccinated HCW and BA.2.86/JN.1-wave first responder cohorts**

|                                                               | <b>Bivalent HCWs<br/>(n=13)</b> | <b>BA.2.86-JN.1 Wave<br/>Patients<br/>(n=9)</b> |
|---------------------------------------------------------------|---------------------------------|-------------------------------------------------|
| <b>Age in Years at Sample Collection<br/>[Median (Range)]</b> | 37 (25-48)                      | 53(35-78)                                       |
| <b>Gender [n (% of Total)]</b>                                |                                 |                                                 |
| Male                                                          | 8 (61.5%)                       | 4 (44.4%)                                       |
| Female                                                        | 5 (38.5%)                       | 5 (55.6%)                                       |
| <b>Sample Collection Window</b>                               | Dec. 2022- Jan.2023             | Nov. 2023-Feb.2024                              |
| <b>Vaccine status [n (% of Total)]</b>                        |                                 |                                                 |
| 2-dose Moderna                                                | NA                              | 3 (11.1%)                                       |
| 1-dose Moderna+1-dose Pfizer bivalent                         | NA                              | 1 (11.1%)                                       |
| 3-dose Pfizer +1-dose Moderna bivalent                        | 1 (7.7%)                        | 0                                               |
| 2-dose Pfizer+1-dose Pfizer bivalent                          | 1 (7.7%)                        | 0                                               |
| 4-dose Pfizer+1-dose Pfizer bivalent                          | 1 (7.7%)                        | 0                                               |
| 3-dose Pfizer+1-dose Pfizer bivalent                          | 3 (23.1%)                       | 0                                               |
| 3-dose Moderna+1-dose Moderna bivalent                        | 6 (46.2%)                       | 1 (11.1%)                                       |
| 2-dose Moderna+1 Pfizer+1-dose Pfizer bivalent                | 1 (7.7%)                        | 0                                               |
| 3-dose Moderna+1-dose Pfizer bivalent+1-dose Moderna bivalent | 0                               | 1 (11.1%)                                       |
| 2-dose Pfizer +1-dose Moderna                                 | 0                               | 1 (11.1%)                                       |
| 1-dose Pfizer                                                 | 0                               | 1 (11.1%)                                       |
| 3-dose Moderana+1-dose XBB.1.5 Moderna monovalent             | 0                               | 1 (11.1%)                                       |
| <b>Sample Collection Timing [Median (Range)]</b>              |                                 |                                                 |
| Days from last vaccination                                    | NA                              | 656 (45-898)                                    |
| Days post the bivalent dose for recipients                    | 66 (23-108)                     | NA                                              |
| <b>COVID-19 positive [n (% of Total)]</b>                     | 9 (69.2%)                       | 9 (100%)                                        |
| Days before sample collection [Median (Range)]                | 324 (182-994)                   | 7 (1-10)                                        |
| <b>Infected Variants</b>                                      |                                 |                                                 |
| JN.1/BA.2.86                                                  | 0                               | 2 (22.2%)                                       |
| Undetermined                                                  | NA                              | 7 (77.8%)                                       |

405

406 Summary of the demographic information for two cohorts used for neutralization experiments  
407 depicted in Figure 2. “NA” means the category is not applicable to the cohort.
